# Supplementary material for: A low-temperature n-propanol gas sensor based on TeO2 nanowires as the sensing layer
Source: Royal Society of Chemistry journal article supplement (doi:10.1039/c5ra00867k), 2015-01-01
Supplement: c5ra00867k1.pdf [file c5ra00867k1.pdf]

Electronic Supplementary Information for

**A low-temperature n-propanol gas sensor based on TeO<sub>2</sub> nanowires  
as sensing layer**

Yanbai Shen\*, Anfeng Fan, Dezhou Wei, Shuling Gao, Wengang Liu, Cong Han,  
Baoyu Cui

\* College of Resources and Civil Engineering, Northeastern University, Shenyang  
110819, China

## Experimental details

TeO<sub>2</sub> nanowires were synthesized on Au-coated glass substrates by thermal evaporation method. In a typical procedure, 0.5 g of Te powders with a high purity of 99.999% was placed in an Al<sub>2</sub>O<sub>3</sub> boat and positioned in the central part of a 45 cm long horizontal quartz tube in a tubular electric furnace. The glass substrates coated with an Au film with a thickness of about 10 nm by ion beam sputtering method were covered on the top of Te powders with a vertical distance of 5 mm. Then, the furnace was heated to 450 °C at a heating rate of 10 °C min<sup>-1</sup> and maintained at this temperature for 2 h in air at ambient pressure. After the furnace was cooled down to room temperature naturally, a layer of white wire-shaped products was obtained on the Au-coated glass substrates.

The phase structure of TeO<sub>2</sub> nanowires was determined by X-ray diffraction (XRD) using an X-ray diffractometer (PANalytical X'Pert Pro) with Cu K<sub>α1</sub> radiation ( $\lambda = 1.54056 \text{ \AA}$ ) in the  $2\theta$  range of 20–60°. The operating voltage and current were 40 kV and 40 mA, respectively. The morphology of TeO<sub>2</sub> nanowires was observed by means of a field emission scanning electron microscope (FESEM, ZEISS Ultra Plus) with an operating voltage of 20 kV. The microstructure and components of TeO<sub>2</sub> nanowires were further investigated by transmission electron microscope (TEM, FEI G<sup>2</sup>-20) equipped with an energy dispersive X-ray spectrometer (EDX). The operating voltage of TEM measurements was 200 kV. The Fourier transform infrared spectrum (FTIR) was measured on a NICOLET 380 (Thermo Fisher Scientific) FTIR spectrometer.

For fabricating gas sensor based on TeO<sub>2</sub> nanowires, an appropriate amount of

TeO<sub>2</sub> nanowires were mixed with a couple of drops of deionized water and a small amount of terpineol, and then ground softly in an agate mortar to form a slurry. The resulting slurry was coated onto an Al<sub>2</sub>O<sub>3</sub> substrate by a small brush to form a layer of sensing film with a thickness of about 100 μm. The front surface of Al<sub>2</sub>O<sub>3</sub> substrate was equipped with a pair of interdigitated Au electrodes, which had been previously printed on the substrate. A resistance heater was set on the rear surface of Al<sub>2</sub>O<sub>3</sub> substrate to control the operating temperature. After drying in air at room temperature for 30 min, the Al<sub>2</sub>O<sub>3</sub> substrate was assembled onto the sensor holder by connecting the corresponding lead wire to form the gas sensor device. Then, the device was sintered at 300 °C for 2 h to stabilize the sensing film structure and decompose the terpineol.

The gas sensing measurements were performed at the operating temperatures of 24–100 °C by a static process in a commercial gas sensing test system (WS-30A, Weisheng Electronics Co., Ltd., PR China) in a fume hood. Namely, n-propanol gas was introduced into the chamber to a predefined concentration of 100–1000 ppm by mixing air and n-propanol gas by a fan. The n-propanol gas was prepared by thermal evaporation of absolute n-propanol liquid at a hot evaporator with a high temperature of 300 °C. When the response reached a constant value, the upper cover of the test chamber was removed to exhaust the n-propanol gas. The electrical resistance of gas sensor was determined by measuring the voltage when a voltage of 5 V was applied between Au interdigitated electrodes by a volt-amperometric method. The sensor response was defined as  $R_a/R_g$ , where  $R_a$  and  $R_g$  were the electrical resistances before

and after the introduction of n-propanol gas, respectively.
